# Supplementary material for: Responses of Pine Island and Thwaites Glaciers to Melt and Sliding Parameterizations
Source: Copernicus journal article supplement (doi:10.5194/egusphere-2023-2929), 2024-01-08
Supplement: Supplementary file 1 [file egusphere-2023-2929-supplement.pdf]

Supplement to

# Responses of Pine Island and Thwaites Glaciers to Melt and Sliding Parameterizations

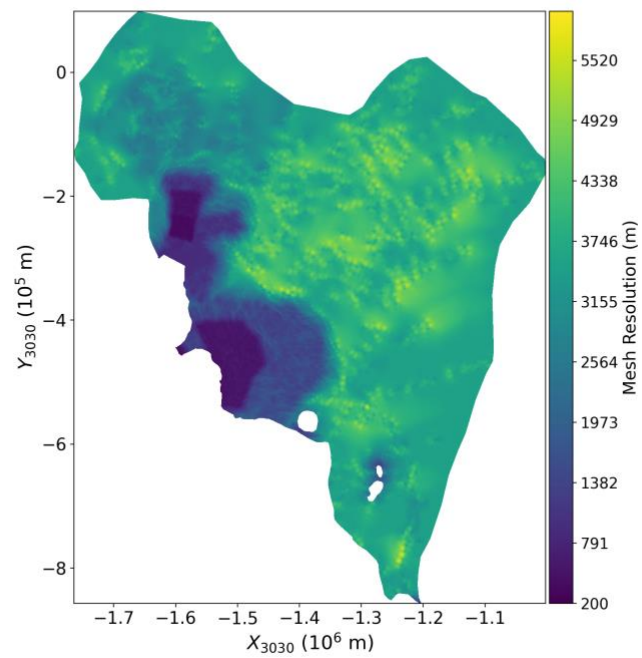

Figure S1. Mesh resolution for the domain that includes Pine Island and Thwaites glaciers.

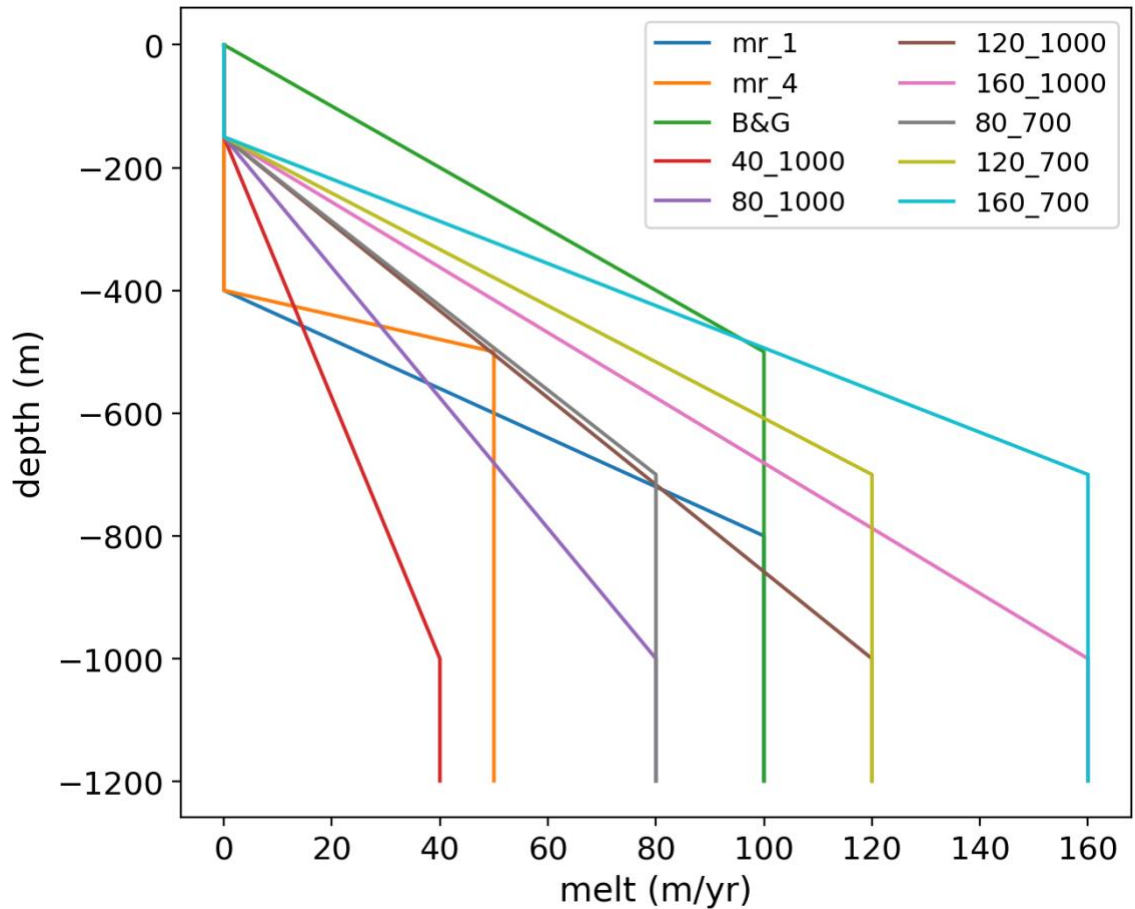

Figure S2. Depth-parameterized melt profiles with mr\_1 and mr\_2 from Gudmundsson et al., (2023), B&G from (2022), and 40\_1000, 80\_1000, 120\_1000, 80\_700, 160\_1000, 80\_700, 120\_700, and 160\_700 from Yu et al., (2018).

## References

Barnes, J. M. and Gudmundsson, G. H.: The predictive power of ice sheet models and the regional sensitivity of ice loss to basal sliding parameterisations: a case study of Pine Island and Thwaites glaciers, West Antarctica, *Cryosphere*, 16, 4291–4304, <https://doi.org/10.5194/tc-16-4291-2022>, 2022.

Gudmundsson, G. H., Barnes, J. M., Goldberg, D. N., and Morlighem, M.: Limited Impact of Thwaites Ice Shelf on Future Ice Loss From Antarctica, *Geophys. Res. Lett.*, 50, <https://doi.org/10.1029/2023gl102880>, 2023.

Yu, H., Rignot, E., Seroussi, H., and Morlighem, M.: Retreat of Thwaites Glacier, West Antarctica, over the next 100 years using various ice flow models, ice shelf melt scenarios and basal friction laws, *The Cryosphere*, 12, 3861–3876, <https://doi.org/10.5194/tc-12-3861-2018>, 2018.
